# Supplementary material
Source: PubMed Central journal article supplement (PMC3171193)
Supplement: NIHMS188960-supplement-Electronic_Supplementary_Material.pdf [file NIHMS188960-supplement-Electronic_Supplementary_Material.pdf]

# **Predicting the Photoinduced Electron Transfer Thermodynamics in 1,3,5-Triarylpyrazolines Based on Multiple Linear Free Energy Relationships**

Manjusha Verma, Aneese F. Chaudhry, and Christoph J. Fahrni\*

## **Supporting Information**

### **Table of Contents**

Geometry optimized structures of polyfluorobenzenes

S2-S7

**Table S1-1:** Cartesian Atomic Coordinates for the Geometry Optimized Structure of Benzene (B3LYP/6-311+G(2d,2p)).

| Atom | x/Å       | y/Å       | z/Å      |
|------|-----------|-----------|----------|
| H    | 0.000000  | -2.473053 | 0.000000 |
| C    | 0.000000  | -1.391331 | 0.000000 |
| C    | 0.000000  | 1.391331  | 0.000000 |
| C    | -1.205725 | -0.695861 | 0.000000 |
| C    | 1.205725  | -0.695861 | 0.000000 |
| C    | 1.205725  | 0.695861  | 0.000000 |
| C    | -1.205725 | 0.695861  | 0.000000 |
| H    | -2.142081 | -1.237457 | 0.000000 |
| H    | 2.142081  | -1.237457 | 0.000000 |
| H    | 2.142081  | 1.237457  | 0.000000 |
| H    | -2.142081 | 1.237457  | 0.000000 |
| H    | 0.000000  | 2.473053  | 0.000000 |

**Table S1-2:** Cartesian Atomic Coordinates for the Geometry Optimized Structure of Fluorobenzene (B3LYP/6-311+G(2d,2p)).

| Atom | x/Å       | y/Å      | z/Å       |
|------|-----------|----------|-----------|
| C    | 0.000000  | 0.000000 | 1.829310  |
| H    | 0.000000  | 0.000000 | 2.910127  |
| C    | 1.204675  | 0.000000 | 1.132290  |
| C    | 1.213587  | 0.000000 | -0.259081 |
| C    | 0.000000  | 0.000000 | -0.924105 |
| C    | -1.213587 | 0.000000 | -0.259081 |
| C    | -1.204675 | 0.000000 | 1.132290  |
| H    | -2.142543 | 0.000000 | 1.670292  |
| H    | -2.133709 | 0.000000 | -0.824810 |
| F    | 0.000000  | 0.000000 | -2.278981 |
| H    | 2.133709  | 0.000000 | -0.824810 |
| H    | 2.142543  | 0.000000 | 1.670292  |

**Table S1-3:** Cartesian Atomic Coordinates for the Geometry Optimized Structure of 1,2-Difluorobenzene (B3LYP/6-311+G(2d,2p)).

| Atom | x/Å       | y/Å      | z/Å       |
|------|-----------|----------|-----------|
| C    | -0.694211 | 0.000000 | 0.532532  |
| C    | 0.695220  | 0.000000 | -1.861975 |
| C    | 0.694211  | 0.000000 | 0.532532  |
| C    | -1.395699 | 0.000000 | -0.659181 |
| C    | -0.695220 | 0.000000 | -1.861975 |
| C    | 1.395699  | 0.000000 | -0.659181 |
| H    | -2.475745 | 0.000000 | -0.629725 |
| H    | -1.240162 | 0.000000 | -2.794924 |
| H    | 2.475745  | 0.000000 | -0.629725 |
| H    | 1.240162  | 0.000000 | -2.794924 |
| F    | -1.351059 | 0.000000 | 1.706266  |
| F    | 1.351059  | 0.000000 | 1.706266  |

**Table S1-4:** Cartesian Atomic Coordinates for the Geometry Optimized Structure of 1,3-Difluorobenzene (B3LYP/6-311+G(2d,2p)).

| Atom | x/Å       | y/Å      | z/Å       |
|------|-----------|----------|-----------|
| C    | 1.180585  | 0.000000 | 0.302609  |
| C    | -1.211601 | 0.000000 | -1.081151 |
| C    | 0.000000  | 0.000000 | 1.025917  |
| C    | 1.211601  | 0.000000 | -1.081151 |
| C    | 0.000000  | 0.000000 | -1.765201 |
| C    | -1.180585 | 0.000000 | 0.302609  |
| H    | 0.000000  | 0.000000 | 2.104961  |
| H    | 2.159230  | 0.000000 | -1.598058 |
| H    | 0.000000  | 0.000000 | -2.845961 |
| H    | -2.159230 | 0.000000 | -1.598058 |
| F    | 2.347076  | 0.000000 | 0.984185  |
| F    | -2.347076 | 0.000000 | 0.984185  |

**Table S1-5:** Cartesian Atomic Coordinates for the Geometry Optimized Structure of 1,4-Difluorobenzene (B3LYP/6-311+G(2d,2p)).

| Atom | x/Å       | y/Å       | z/Å      |
|------|-----------|-----------|----------|
| C    | 1.362760  | 0.000000  | 0.000000 |
| C    | -1.362760 | 0.000000  | 0.000000 |
| C    | 0.695466  | 1.212592  | 0.000000 |
| C    | 0.695466  | -1.212592 | 0.000000 |
| C    | -0.695466 | -1.212592 | 0.000000 |
| C    | -0.695466 | 1.212592  | 0.000000 |
| H    | 1.257915  | 2.134358  | 0.000000 |
| H    | 1.257915  | -2.134358 | 0.000000 |
| H    | -1.257915 | -2.134358 | 0.000000 |
| H    | -1.257915 | 2.134358  | 0.000000 |
| F    | 2.716936  | 0.000000  | 0.000000 |
| F    | -2.716936 | 0.000000  | 0.000000 |

**Table S1-6:** Cartesian Atomic Coordinates for the Geometry Optimized Structure of 1,2,3-Trifluorobenzene (B3LYP/6-311+G(2d,2p)).

| Atom | x/Å       | y/Å      | z/Å       |
|------|-----------|----------|-----------|
| C    | 1.195569  | 0.000000 | 0.013059  |
| C    | -1.209769 | 0.000000 | -1.370236 |
| C    | 0.000000  | 0.000000 | 0.719129  |
| C    | 1.209769  | 0.000000 | -1.370236 |
| C    | 0.000000  | 0.000000 | -2.056270 |
| C    | -1.195569 | 0.000000 | 0.013059  |
| H    | 2.158737  | 0.000000 | -1.885226 |
| F    | 2.345488  | 0.000000 | 0.706081  |
| H    | 0.000000  | 0.000000 | -3.136352 |
| F    | 0.000000  | 0.000000 | 2.056260  |
| H    | -2.158737 | 0.000000 | -1.885226 |
| F    | -2.345488 | 0.000000 | 0.706081  |

**Table S1-7:** Cartesian Atomic Coordinates for the Geometry Optimized Structure of 1,2,4-Trifluorobenzene (B3LYP/6-311+G(2d,2p)).

| Atom | x/Å       | y/Å       | z/Å      |
|------|-----------|-----------|----------|
| C    | 1.111940  | 0.560703  | 0.000000 |
| C    | -1.558011 | -0.062445 | 0.000000 |
| C    | 0.706716  | -0.767589 | 0.000000 |
| C    | 0.174462  | 1.576885  | 0.000000 |
| C    | -1.182788 | 1.268778  | 0.000000 |
| C    | -0.636908 | -1.097445 | 0.000000 |
| H    | 0.515762  | 2.601712  | 0.000000 |
| F    | 2.425793  | 0.847885  | 0.000000 |
| H    | -1.934422 | 2.043382  | 0.000000 |
| H    | -0.952137 | -2.129764 | 0.000000 |
| F    | 1.632573  | -1.738037 | 0.000000 |
| F    | -2.871885 | -0.375253 | 0.000000 |

**Table S1-8:** Cartesian Atomic Coordinates for the Geometry Optimized Structure of 1,3,5-Trifluorobenzene (B3LYP/6-311+G(2d,2p)).

| Atom | x/Å       | y/Å      | z/Å       |
|------|-----------|----------|-----------|
| C    | 0.000000  | 0.000000 | 1.361553  |
| C    | 0.000000  | 0.000000 | -1.405661 |
| C    | -1.218261 | 0.000000 | 0.703302  |
| C    | 1.218261  | 0.000000 | 0.703302  |
| C    | 1.179669  | 0.000000 | -0.680623 |
| C    | -1.179669 | 0.000000 | -0.680623 |
| H    | -2.151604 | 0.000000 | 1.243306  |
| H    | 2.151604  | 0.000000 | 1.243306  |
| H    | 0.000000  | 0.000000 | -2.484160 |
| F    | 0.000000  | 0.000000 | 2.709028  |
| F    | -2.346114 | 0.000000 | -1.355066 |
| F    | 2.346114  | 0.000000 | -1.355066 |

**Table S1-9:** Cartesian Atomic Coordinates for the Geometry Optimized Structure of 1,2,3,4-Tetrafluorobenzene (B3LYP/6-311+G(2d,2p)).

| Atom | x/Å       | y/Å      | z/Å       |
|------|-----------|----------|-----------|
| C    | 0.695387  | 0.000000 | 1.726745  |
| C    | -0.694236 | 0.000000 | -0.684469 |
| C    | -0.695387 | 0.000000 | 1.726745  |
| C    | 1.377587  | 0.000000 | 0.524984  |
| C    | 0.694236  | 0.000000 | -0.684469 |
| C    | -1.377587 | 0.000000 | 0.524984  |
| F    | -2.720095 | 0.000000 | 0.502772  |
| F    | 1.358521  | 0.000000 | -1.841874 |
| F    | 2.720095  | 0.000000 | 0.502772  |
| H    | 1.257289  | 0.000000 | 2.648344  |
| F    | -1.358521 | 0.000000 | -1.841874 |
| H    | -1.257289 | 0.000000 | 2.648344  |

**Table S1-10:** Cartesian Atomic Coordinates for the Geometry Optimized Structure of 1,2,3,5-Tetrafluorobenzene (B3LYP/6-311+G(2d,2p)).

| Atom | x/Å       | y/Å      | z/Å       |
|------|-----------|----------|-----------|
| C    | 0.000000  | 0.000000 | 1.089869  |
| C    | 0.000000  | 0.000000 | -1.663248 |
| C    | 1.194122  | 0.000000 | 0.381511  |
| C    | -1.194122 | 0.000000 | 0.381511  |
| C    | -1.216213 | 0.000000 | -1.002314 |
| C    | 1.216213  | 0.000000 | -1.002314 |
| H    | -2.151113 | 0.000000 | -1.540130 |
| H    | 2.151113  | 0.000000 | -1.540130 |
| F    | -2.344372 | 0.000000 | 1.067706  |
| F    | 0.000000  | 0.000000 | 2.426904  |
| F    | 2.344372  | 0.000000 | 1.067706  |
| F    | 0.000000  | 0.000000 | -3.010075 |

**Table S1-11:** Cartesian Atomic Coordinates for the Geometry Optimized Structure of 1,2,4,5-Tetrafluorobenzene (B3LYP/6-311+G(2d,2p)).

| Atom | x/Å       | y/Å       | z/Å      |
|------|-----------|-----------|----------|
| C    | 0.000000  | -1.397213 | 0.000000 |
| C    | 0.000000  | 1.397213  | 0.000000 |
| C    | -1.191879 | -0.693834 | 0.000000 |
| C    | 1.191879  | -0.693834 | 0.000000 |
| C    | 1.191879  | 0.693834  | 0.000000 |
| C    | -1.191879 | 0.693834  | 0.000000 |
| H    | 0.000000  | 2.476652  | 0.000000 |
| H    | 0.000000  | -2.476652 | 0.000000 |
| F    | -2.358881 | -1.355647 | 0.000000 |
| F    | -2.358881 | 1.355647  | 0.000000 |
| F    | 2.358881  | 1.355647  | 0.000000 |
| F    | 2.358881  | -1.355647 | 0.000000 |

**Table S1-12:** Cartesian Atomic Coordinates for the Geometry Optimized Structure of 1,2,3,4,5-Pentafluorobenzene (B3LYP/6-311+G(2d,2p)).

| Atom | x/Å       | y/Å      | z/Å       |
|------|-----------|----------|-----------|
| C    | 0.000000  | 0.000000 | 1.669616  |
| C    | 0.000000  | 0.000000 | -1.113939 |
| C    | -1.190223 | 0.000000 | 0.964237  |
| C    | 1.190223  | 0.000000 | 0.964237  |
| C    | 1.205244  | 0.000000 | -0.423129 |
| C    | -1.205244 | 0.000000 | -0.423129 |
| F    | -2.357461 | 0.000000 | 1.621445  |
| F    | -2.357508 | 0.000000 | -1.096785 |
| F    | 2.357508  | 0.000000 | -1.096785 |
| F    | 2.357461  | 0.000000 | 1.621445  |
| H    | 0.000000  | 0.000000 | 2.748674  |
| F    | 0.000000  | 0.000000 | -2.446657 |
